# Supplementary material
Source: PubMed Central journal article supplement (PMC6200136)
Supplement: NIHMS986748-supplement-S1.pdf [file NIHMS986748-supplement-S1.pdf]

## SUPPORTING INFORMATION

### **Structural basis of Wee kinases functionality and inactivation by diverse small molecule inhibitors**

Jin-Yi Zhu<sup>1</sup>, Rebecca Cuellar<sup>2</sup>, Norbert Berndt<sup>1</sup>, Hee Eun Lee<sup>1</sup>, Sanne Olesen<sup>1</sup>, Mathew P. Martin<sup>1,4</sup>, Jeffrey T. Jensen<sup>3</sup>, Gunda I. Georg<sup>2\*</sup>, Ernst Schönbrunn<sup>1\*</sup>

Supplementary Tables S1 – S5

Pages S2 – S6

Supplementary Figures S1 – S7

Pages S7 – S16

**Supplementary Table S1: Phosphorylated residues in recombinantly expressed and purified Wee kinases.** Mass spectrometric detection and analysis was performed by MS Bioworks. Only residues with Ascore > 20 and localization probability > 0.5 are listed. Bold formatted residues have been reported as phosphorylation sites in UniProt. Grey highlighted residues are sequence conserved, cyan highlighted residues are conserved phosphorylation sites. The kinase domains were expressed and purified from E. coli, the full-length enzymes from Expi293 mammalian cell cultures as described under Methods.

Wee1 full-length

| Phosphorylation site | Best Ascore | Localization probability | Corresponding residue in Wee2 | Corresponding residue in Myt1 |
|----------------------|-------------|--------------------------|-------------------------------|-------------------------------|
| T69                  | 29.21       | 0.727246                 | L60                           | N/A                           |
| <b>S139</b>          | 66.42       | 1                        | H87                           | N/A                           |
| <b>S150</b>          | 1,000.00    | 1                        | N/A                           | N/A                           |
| <b>S165</b>          | 1,000.00    | 1                        | N/A                           | L2                            |
| T173                 | 1,000.00    | 1                        | Q97                           | M10                           |
| <b>T190</b>          | 168.61      | 1                        | T112                          | I26                           |
| S193                 | 74.63       | 1                        | T115                          | P29                           |
| S196                 | 53.69       | 1                        | S118                          | F32                           |
| S204                 | 20.98       | 0.984283                 | G126                          | S40                           |
| S205                 | 24.95       | 0.993646                 | K127                          | L41                           |
| S211                 | 30.97       | 0.999994                 | P133                          | L47                           |
| S212                 | 24.95       | 0.996813                 | S134                          | S48                           |
| S262                 | 51.21       | 0.999985                 | N/A                           | A88                           |
| <b>S270</b>          | 72.02       | 1                        | A183                          | P95                           |
| <b>S312</b>          | 52.6        | 0.999995                 | T225                          | E123                          |
| Y325                 | 1,000.00    | 1                        | Y238                          | Y136                          |
| S337                 | 1,000.00    | 1                        | L250                          | P148                          |
| S444                 | 70.21       | 1                        | E363                          | N/A                           |
| S471                 | 21.95       | 0.999898                 | N388                          | G259                          |
| S472                 | 23.19       | 0.995229                 | K389                          | T260                          |
| S480                 | 84.28       | 1                        | S397                          | P271                          |
| S559                 | 1,000.00    | 1                        | S476                          | T349                          |
| S573                 | 18.44       | 0.985879                 | L490                          | R363                          |
| S576                 | 41.59       | 0.999861                 | T493                          | A375                          |
| <b>S642</b>          | 41.11       | 0.999845                 | S557                          | R459                          |

**Wee1 kinase domain**

| Phosphorylation site | Best Ascore | Localization probability | Corresponding residue in Wee2 | Corresponding residue in Myt1 |
|----------------------|-------------|--------------------------|-------------------------------|-------------------------------|
| None                 |             |                          |                               |                               |

Supplementary Table S1 (continued)

Wee2 full-length

| Phosphorylation site | Best Ascore | Localization probability | Corresponding residue in Wee1 | Corresponding residue in Myt1 |
|----------------------|-------------|--------------------------|-------------------------------|-------------------------------|
| S123                 | 98.4        | 1                        | I201                          | P37                           |
| Y227                 | 60.18       | 1                        | F314                          | F125                          |
| S522                 | 71.68       | 1                        | A606                          | T412                          |
| S552                 | 1,000.00    | 1                        | M637                          | S454                          |
| S557                 | 61.94       | 1                        | S642                          | R459                          |

Wee2 kinase domain

| Phosphorylation site | Best Ascore | Localization probability | Corresponding residue in Wee1 | Corresponding residue in Myt1 |
|----------------------|-------------|--------------------------|-------------------------------|-------------------------------|
| Y227                 | 60.18       | 1                        | F314                          | F125                          |

Myt1 kinase domain

| Phosphorylation site | Best Ascore | Localization probability | Corresponding residue in Wee1 | Corresponding residue in Wee2 |
|----------------------|-------------|--------------------------|-------------------------------|-------------------------------|
| S89                  | 24.95       | 0.999899                 | C263                          | N/A                           |
| Y97                  | 46.13       | 0.999999                 | Y272                          | P185                          |
| <b>S120</b>          | 1,000.00    | 1                        | E309                          | E222                          |
| Y121                 | 1,000.00    | 1                        | F310                          | F223                          |
| Y136                 | 1,000.00    | 1                        | Y325                          | Y238                          |
| S141                 | 59.45       | 1                        | S330                          | S243                          |
| <b>S160</b>          | 1,000.00    | 1                        | A349                          | A262                          |
| T260                 | 1,000.00    | 1                        | S472                          | K389                          |
| Y319                 | 273.9       | 1                        | R530                          | N447                          |
| T325                 | 83.7        | 1                        | P535                          | P452                          |

**Supplementary Table S2: ITC experimental conditions and thermodynamic parameters of Wee kinases interactions with small molecule inhibitors.**

| Protein | [P]<br>( $\mu\text{M}$ ) | Ligand      | [L]<br>( $\mu\text{M}$ ) | T<br>( $^{\circ}\text{C}$ ) | Kd (nM)          | N    | $\Delta\text{H}$<br>(kcal/mol) | -T $\Delta\text{S}$ | $\Delta\text{G}$<br>(kcal/mol) |
|---------|--------------------------|-------------|--------------------------|-----------------------------|------------------|------|--------------------------------|---------------------|--------------------------------|
| Wee1    | 30                       | PD166285    | 300                      | 15                          | $11.0 \pm 1.6$   | 0.91 | -4.50                          | -5.99               | -10.50                         |
|         | 30                       | MK1775      | 300                      |                             | $13.4 \pm 1.2$   | 0.85 | -4.72                          | -5.65               | -10.36                         |
|         | 30                       | PHA-848125  | 300                      |                             | $13.6 \pm 2.0$   | 0.91 | -6.99                          | -3.37               | -10.36                         |
|         | 30                       | Bos.isomer  | 300                      |                             | $43.7 \pm 10.0$  | 0.99 | -6.07                          | -3.63               | -9.70                          |
|         | 30                       | Bosutinib   | 300                      |                             | $77.5 \pm 6.0$   | 0.95 | -5.71                          | -3.69               | -9.39                          |
|         | 30                       | PF-03814735 | 300                      |                             | $78.7 \pm 8.3$   | 1.08 | -4.07                          | -5.30               | -9.37                          |
|         | 30                       | Pelitinib   | 300                      |                             | $172 \pm 22.3$   | 0.98 | -2.65                          | -6.25               | -8.91                          |
|         | 30                       | Dasatinib   | 750                      |                             | $5700 \pm 314$   | 1.14 | -2.25                          | -4.67               | -6.91                          |
|         | 30                       | Saracatinib | 300                      |                             | NB               | NB   | NB                             | NB                  | NB                             |
| Wee2    | 20                       | PD166285    | 200                      | 25                          | $5.0 \pm 0.8$    | 0.66 | -14.24                         | 2.91                | -11.33                         |
|         | 20                       | MK1775      | 200                      |                             | $27.0 \pm 3.6$   | 0.89 | -10.38                         | 0.06                | -10.32                         |
|         | 20                       | PHA-848125  | 200                      |                             | $26.6 \pm 4.2$   | 0.87 | -7.25                          | -3.10               | -10.35                         |
|         | 20                       | Bos. isomer | 200                      |                             | $4.7 \pm 2.3$    | 0.86 | -12.89                         | 1.53                | -11.36                         |
|         | 20                       | Bosutinib   | 200                      |                             | $106 \pm 4.3$    | 0.88 | -12.40                         | 2.89                | -9.51                          |
|         | 20                       | PF-03814735 | 200                      |                             | $128 \pm 17.3$   | 0.91 | -6.90                          | -2.51               | -9.41                          |
|         | 20                       | Pelitinib   | 300                      |                             | $498 \pm 48.3$   | 0.98 | -8.03                          | -0.57               | -8.60                          |
|         | 20                       | Dasatinib   | 200                      |                             | $481 \pm 30.5$   | 0.77 | -10.16                         | 1.55                | -8.61                          |
|         | 20                       | Saracatinib | 300                      |                             | NB               | NB   | NB                             | NB                  | NB                             |
| Myt1    | 20                       | PD166285    | 200                      | 25                          | $247 \pm 58.1$   | 0.94 | -8.76                          | -0.25               | -9.01                          |
|         | 20                       | MK1775      | 200                      |                             | $324 \pm 27.3$   | 0.75 | -15.95                         | 7.10                | -8.85                          |
|         | 20                       | PHA-848125  | 300                      |                             | $990 \pm 55.2$   | 0.85 | -7.92                          | -0.27               | -8.19                          |
|         | 20                       | Bos. isomer | 300                      |                             | $444 \pm 41.0$   | 0.93 | -10.21                         | 1.54                | -8.67                          |
|         | 20                       | Bosutinib   | 200                      |                             | $270 \pm 17.2$   | 0.78 | -15.56                         | 6.59                | -8.97                          |
|         | 20                       | PF-03814735 | 200                      |                             | NB               | NB   | NB                             | NB                  | NB                             |
|         | 20                       | Pelitinib   | 300                      |                             | $1105 \pm 82.9$  | 0.96 | -7.91                          | -0.22               | -8.13                          |
|         | 20                       | Dasatinib   | 200                      |                             | $150 \pm 9.1$    | 0.81 | -9.26                          | -0.05               | -9.31                          |
|         | 20                       | Saracatinib | 300                      |                             | $2817 \pm 144.4$ | 0.65 | -12.20                         | 4.62                | -7.58                          |

**Supplementary Table S3: Co-crystallization conditions for the kinase domains of Wee1, Wee2 and Myt1 with small molecule inhibitors.**

| Protein             | Protein Buffer                                 | [Protein]<br>(mg mL <sup>-1</sup> ) | Ligand                 | Reservoir solution                                                                                     |
|---------------------|------------------------------------------------|-------------------------------------|------------------------|--------------------------------------------------------------------------------------------------------|
| Wee1                | 50 mM Na/K phosphate (pH 6.9), 2 mM DTT        | 18.0                                | MK1775<br>2 mM         | 0.2 M ammonium sulfate, 0.1 M Bis-tris (pH 5.5), and 25 % PEG 3350                                     |
|                     |                                                |                                     | PD166285<br>1 mM       |                                                                                                        |
|                     |                                                | 10.0                                | PHA-848125<br>1 mM     | 0.1 M ammonium sulfate, 0.1 M Bis-tris (pH 5.5), and 15 % PEG 3350                                     |
|                     |                                                |                                     | Bosutinib isomer, 1 mM |                                                                                                        |
|                     |                                                |                                     | Bosutinib<br>1 mM      |                                                                                                        |
| PF-03814735<br>1 mM |                                                |                                     |                        |                                                                                                        |
| Wee2                | 50 mM Tris (pH 8.0), 2 mM DTT                  |                                     | MK1775<br>2 mM         | 0.4 M ammonium phosphate monobasic                                                                     |
| Myt1                | 50 mM HEPES (pH 7.5), 300 mM NaCl and 1 mM DTT | 13.8                                | Dasatinib<br>1 mM      | 0.2 M calcium chloride, 0.1 M Tris (pH 8.5), and 20% PEG 4,000                                         |
|                     |                                                |                                     | Saracatinib<br>2 mM    |                                                                                                        |
|                     |                                                |                                     | Pelitinib<br>2 mM      | 0.1 M MES (pH 6.5), and 1.6 M magnesium sulfate                                                        |
| LAMBD treated Myt1  | 50 mM HEPES (pH 7.5), 2 mM DTT                 | 23.5                                | MK1775<br>2 mM         | 0.1 M potassium chloride, 0.05 M HEPES (pH 7.5), and 35% (v/v) pentaerythritol propoxylate (5/4 PO/OH) |
|                     |                                                |                                     | PHA-848125<br>1 mM     |                                                                                                        |
|                     |                                                |                                     | Bosutinib isomer, 1 mM |                                                                                                        |
|                     |                                                |                                     | Bosutinib<br>1 mM      |                                                                                                        |
|                     |                                                |                                     | Saracatinib<br>2 mM    |                                                                                                        |

**Supplementary Table S4: X-ray crystal structure data collection and refinement statistics.**

See attached excel sheet

**Supplementary Table S5: Kinome profiling results of MK1775 (500 nM single concentration) determined by Discoverx Corp.**

See attached excel sheet

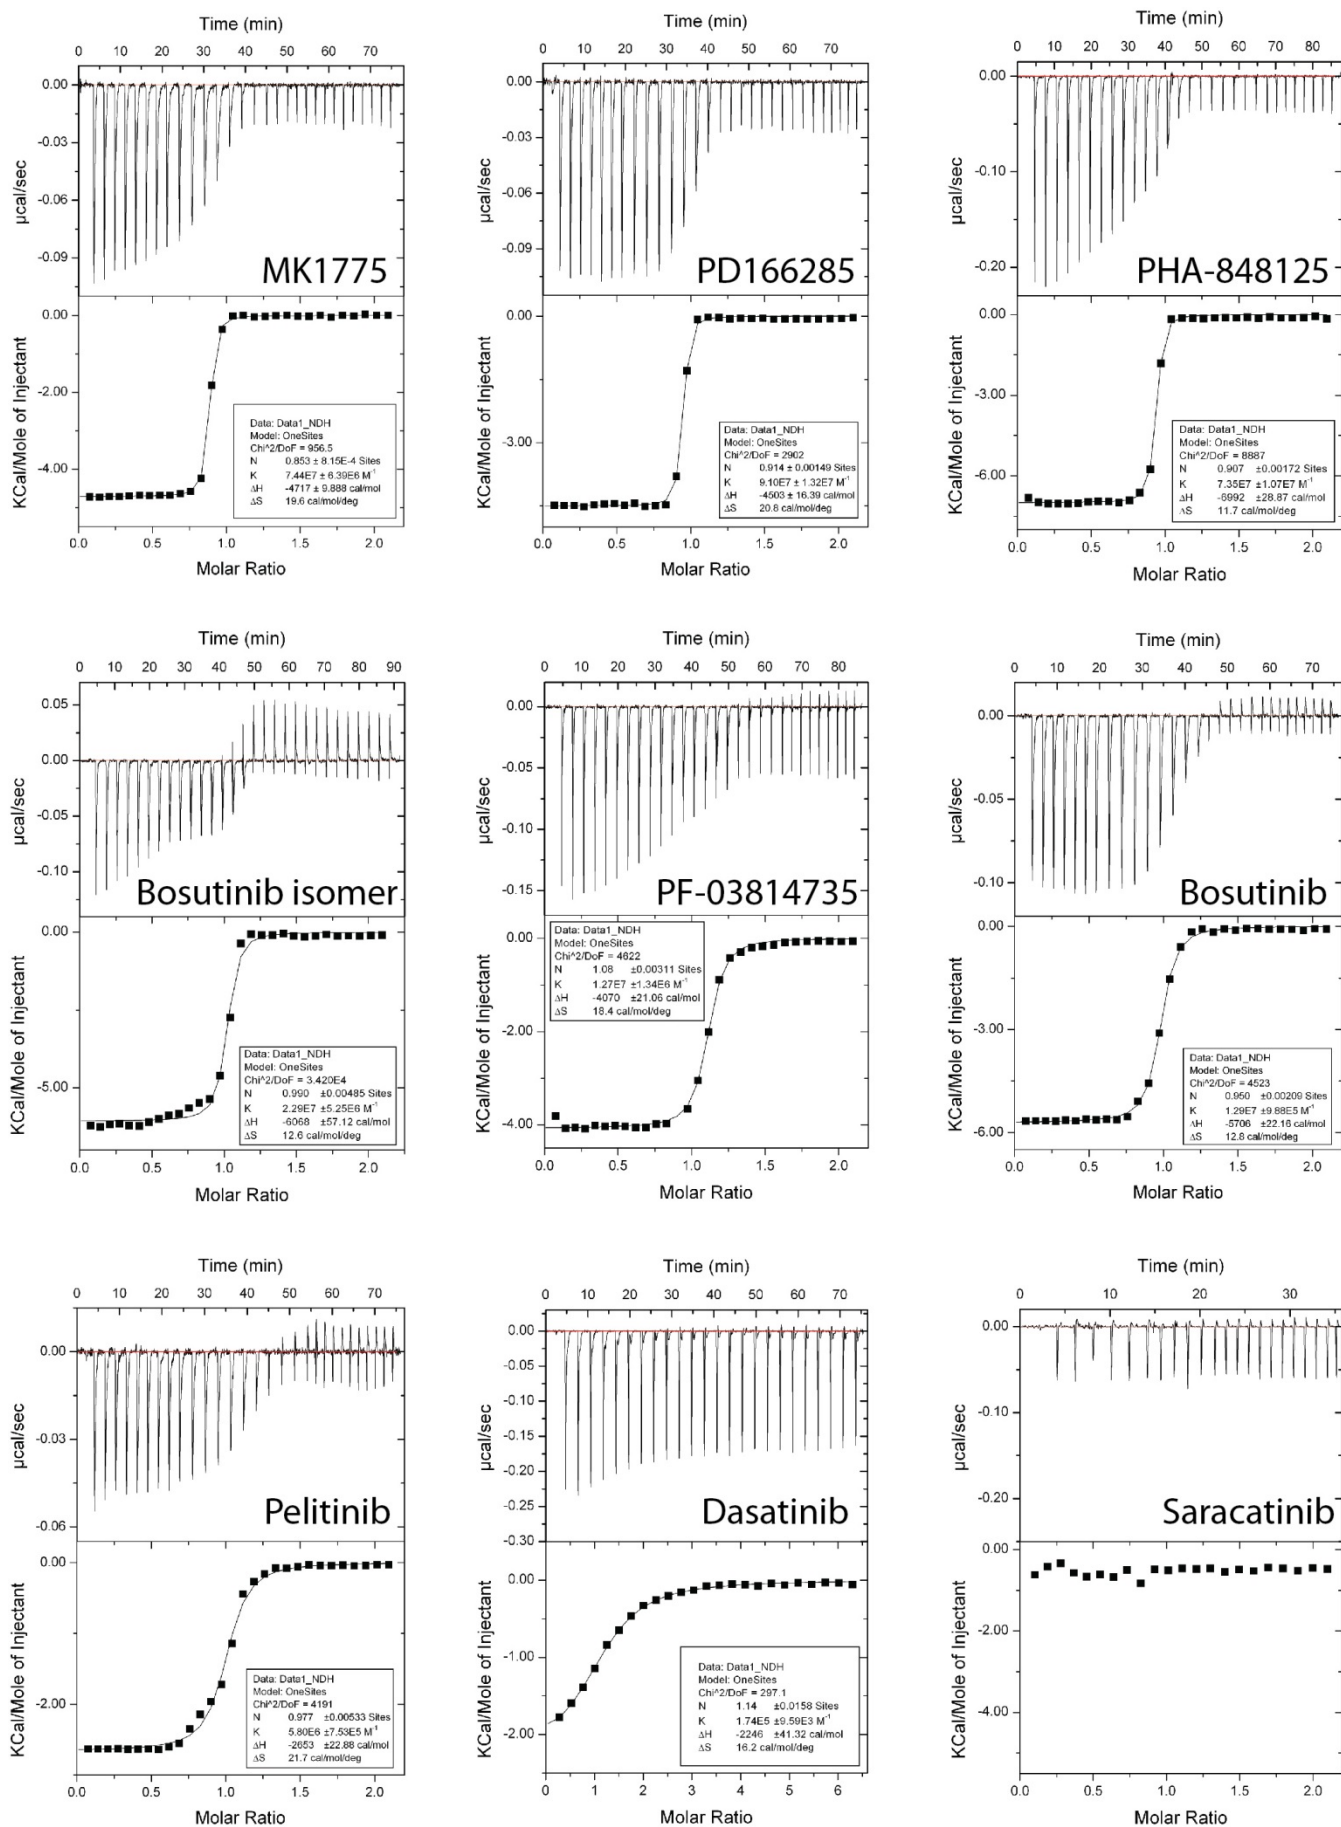

Supplementary Fig. S1: ITC data of Wee1 kinase domain interaction with inhibitors.

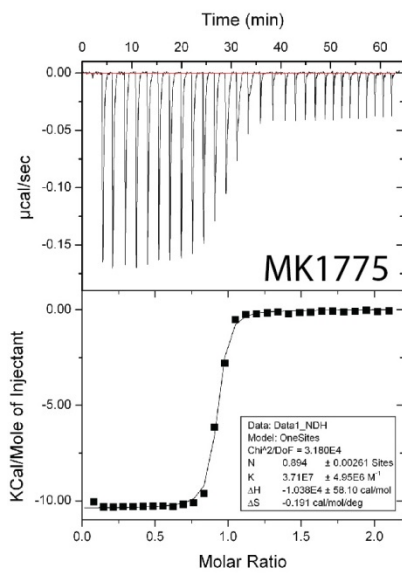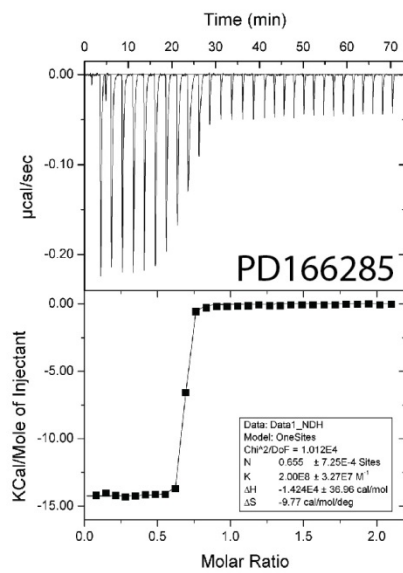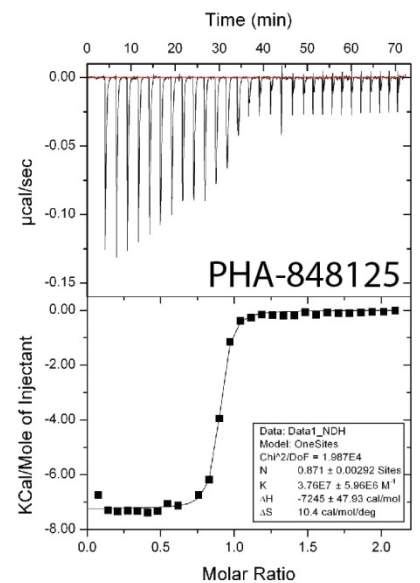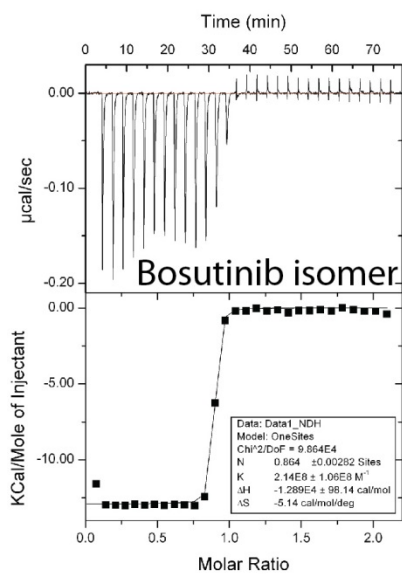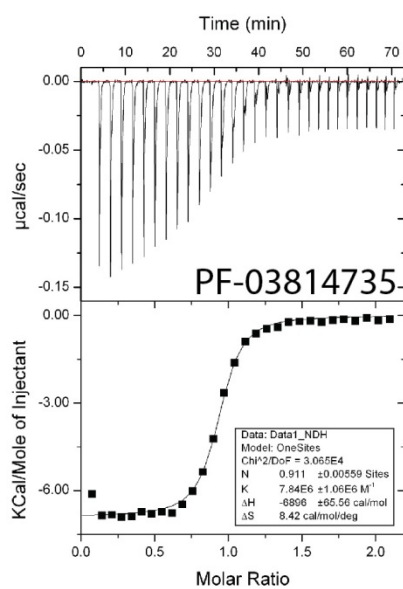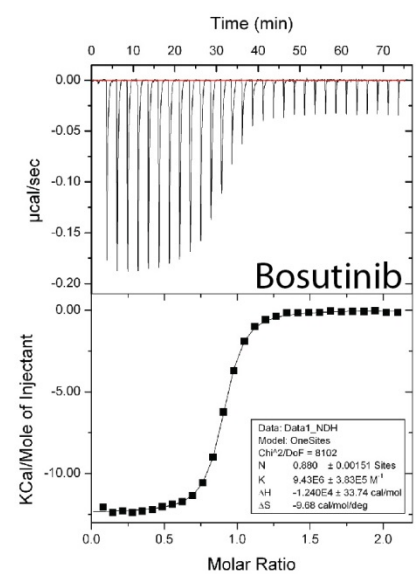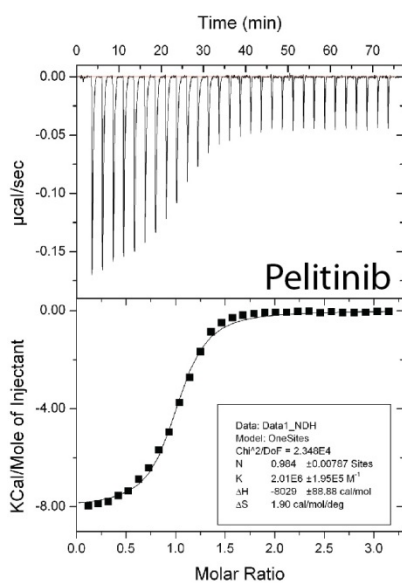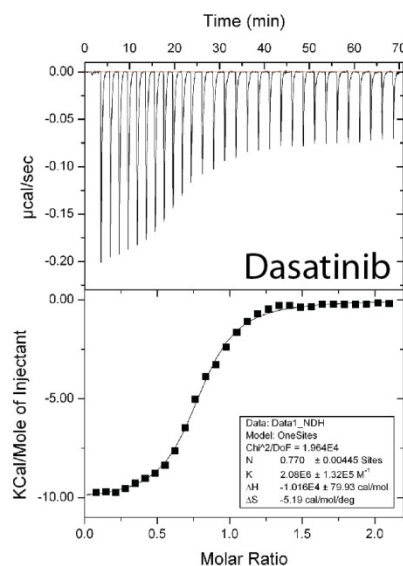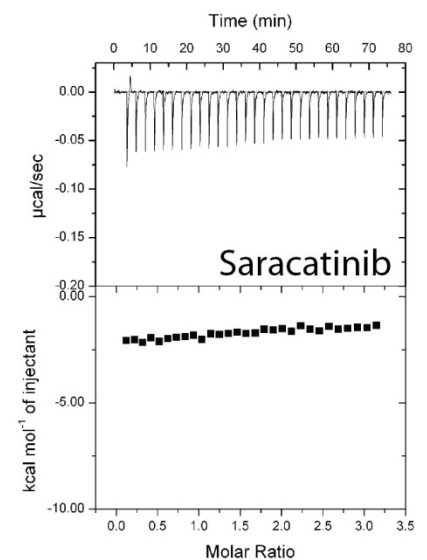

Supplementary Fig. S2: ITC data of Wee2 kinase domain interaction with inhibitors.



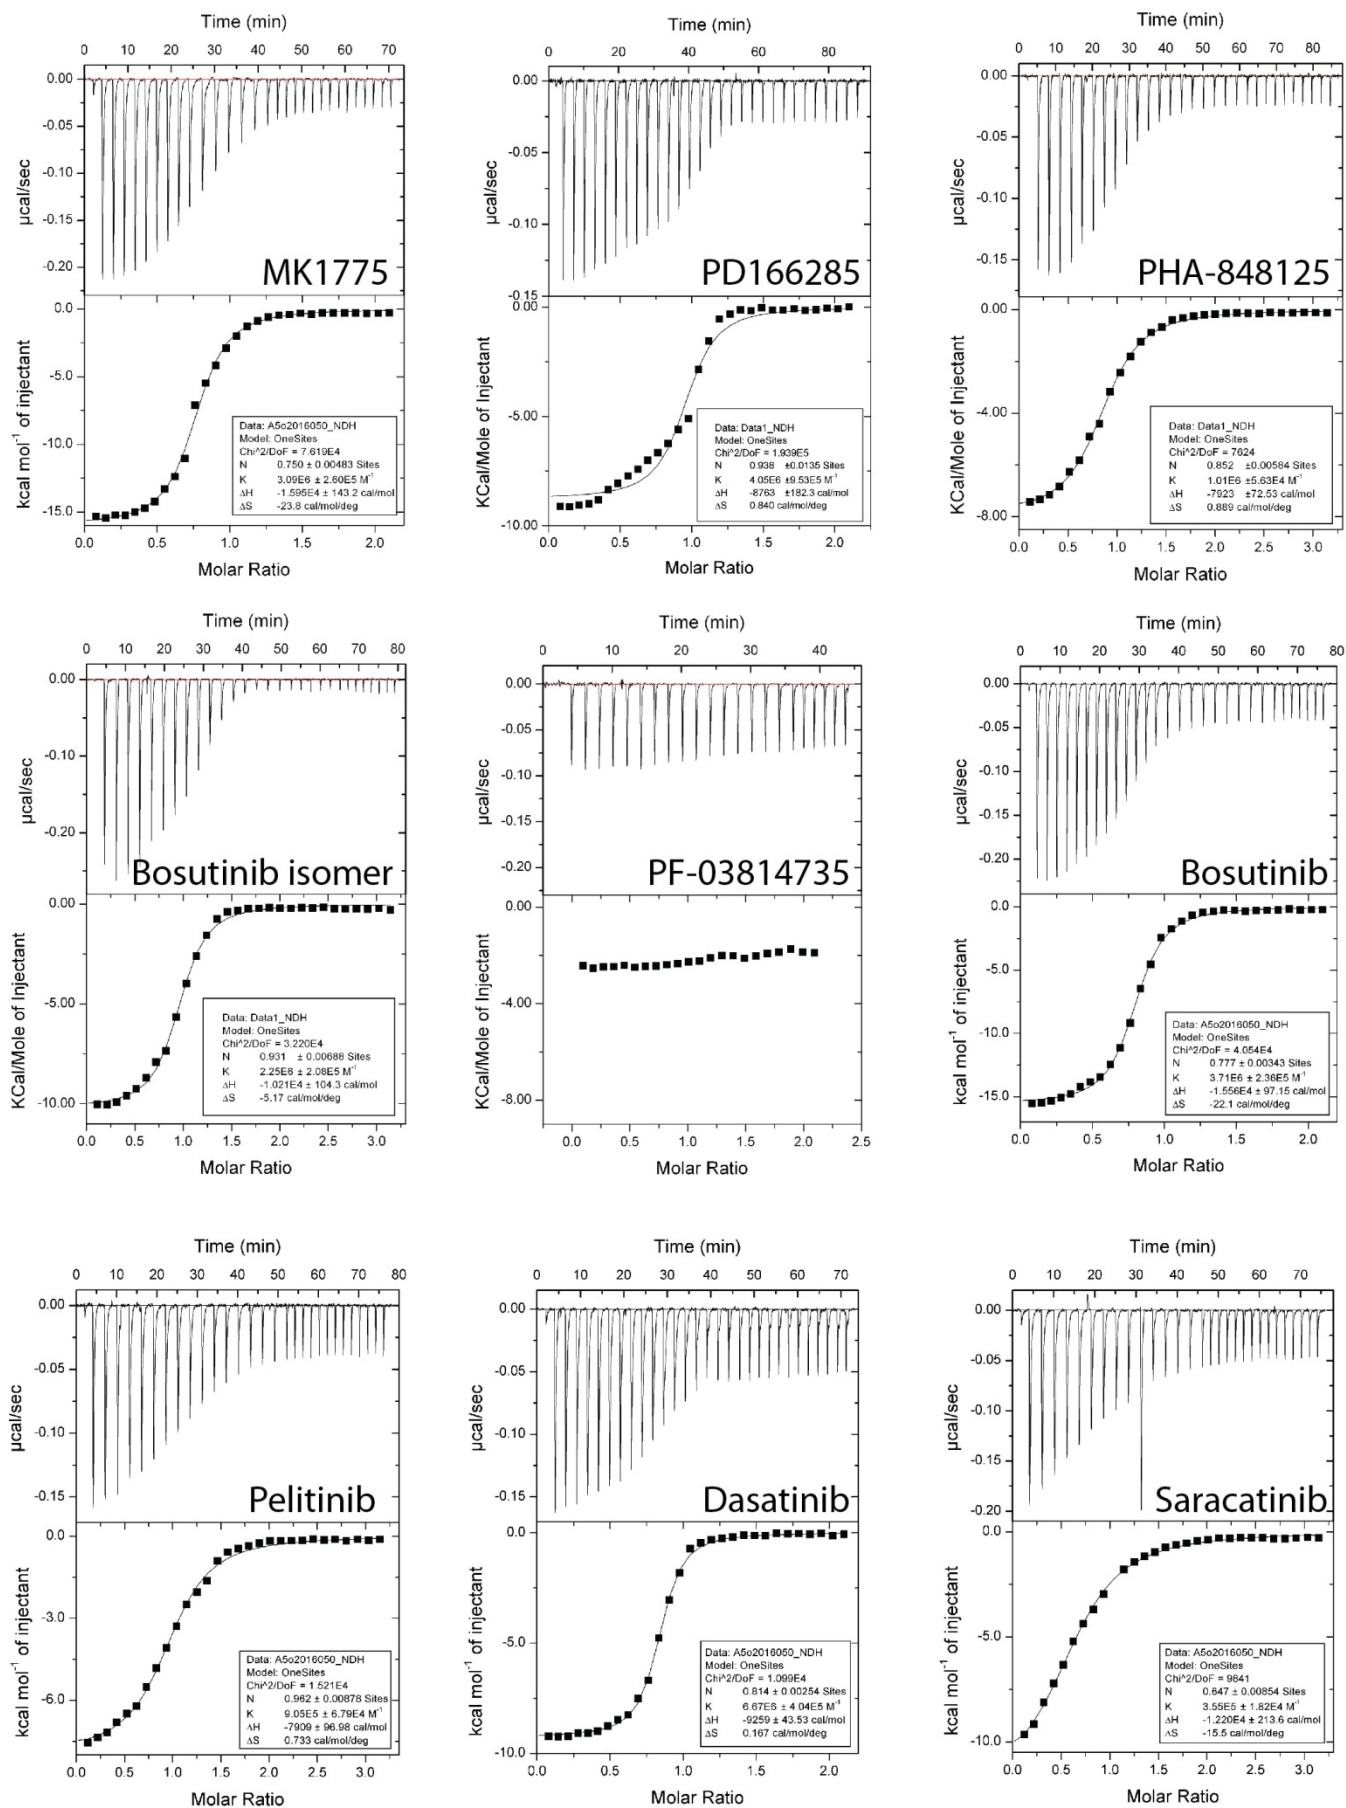

Supplementary Fig. S3: ITC data of Myt1 kinase domain interaction with inhibitors.

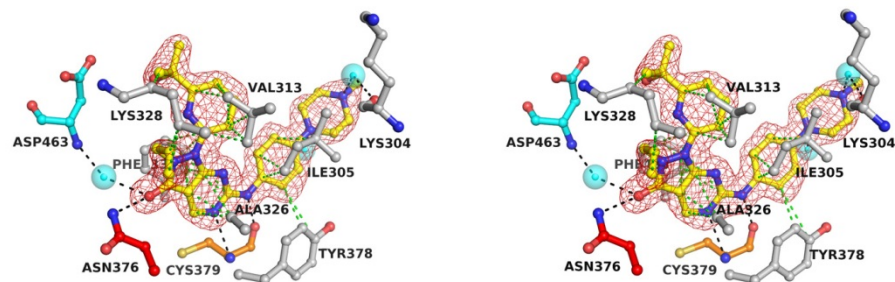

MK1775

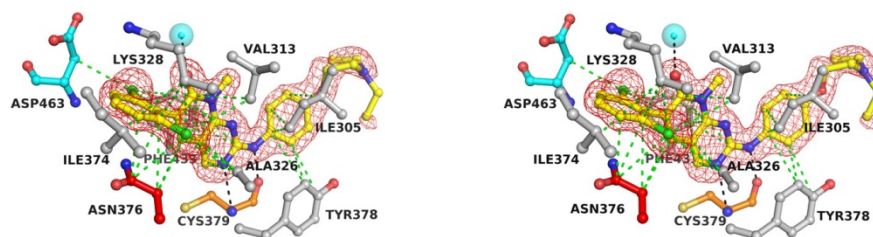

PD-166285

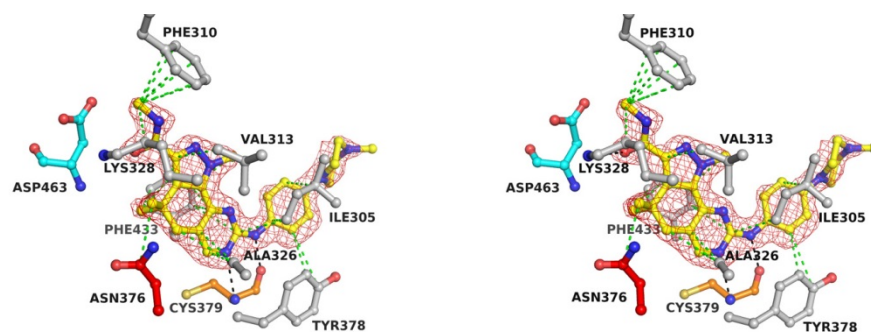

PHA-848125

**Supplementary Figure S4: Detailed binding interactions of inhibitors with the ATP binding site of Wee1.** Stereo-presentations of the ATP binding site with ligand shown in yellow and the corresponding Fo-Fc electron density map (contoured at  $3\sigma$ ) in red. Protein residues are shown in gray, hinge residue Cys379 in orange, gatekeeper residue Asn376 in red, Asp463 of DLG in cyan and water molecules as cyan spheres. Hydrogen bonding interactions are indicated as black dotted lines and VDW interactions (hydrophobic) interactions as green dotted lines.

## Supplementary Fig. S4 (continued)

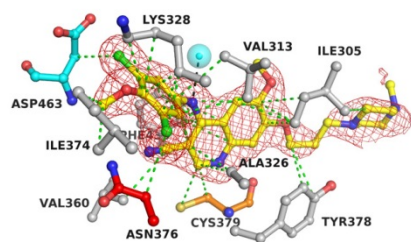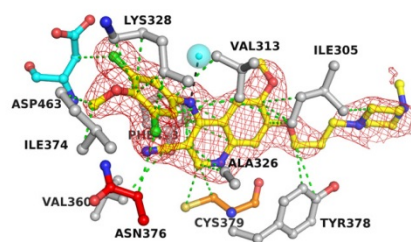

Bosutinib isomer

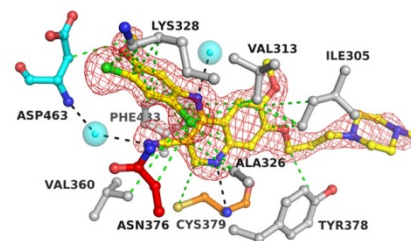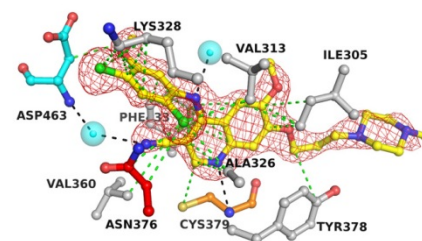

Bosutinib

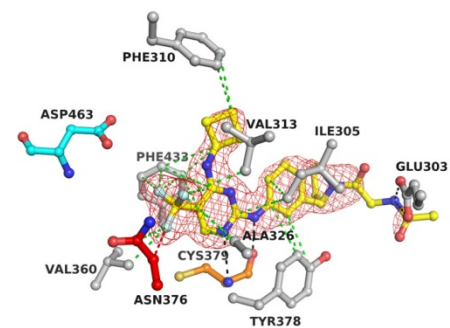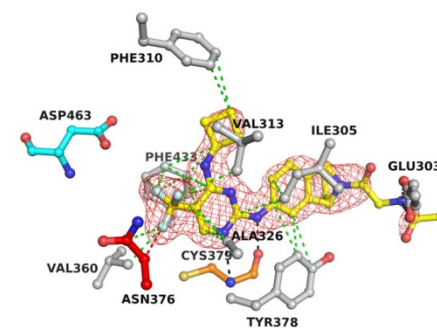

PF-03814735

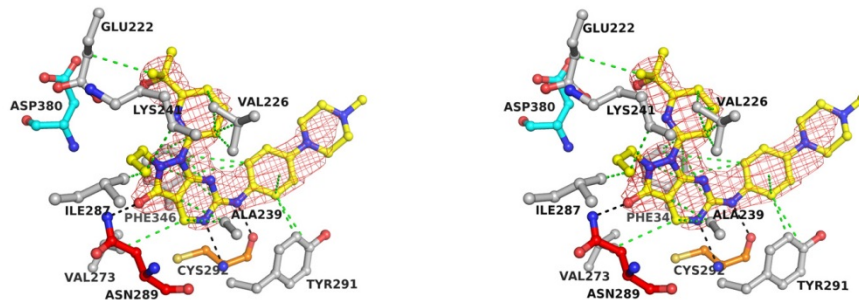

## MK1775

**Supplementary Figure S5: Detailed binding interactions of inhibitors with the ATP binding site of Wee2.** Stereo-presentations of the ATP binding site with ligand shown in yellow and the corresponding Fo-Fc electron density map (contoured at  $3\sigma$ ) in red. Protein residues are shown in gray, hinge residue Cys292 in orange, gatekeeper residue Asn289 in red, Asp380 of DLG in cyan and water molecules as cyan spheres. Hydrogen bonding interactions are indicated as black dotted lines and VDW interactions (hydrophobic) interactions as green dotted lines.

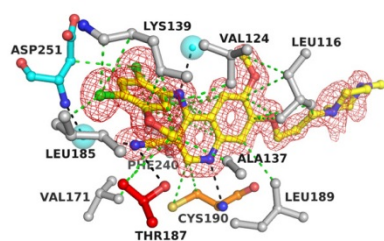

Bosutinib

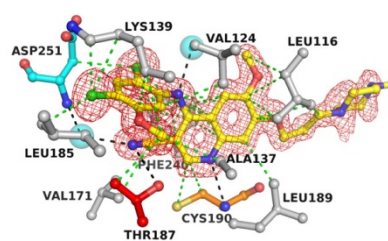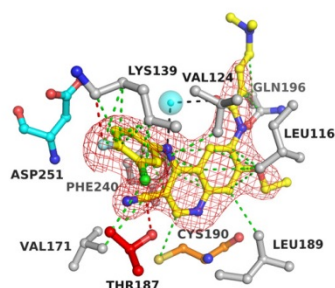

Pelitinib

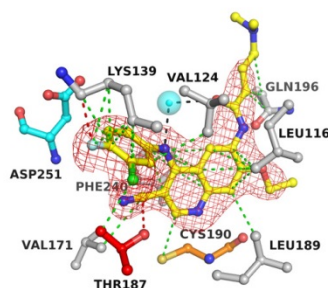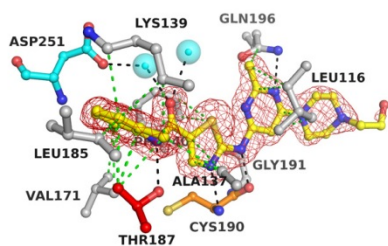

Dasatinib

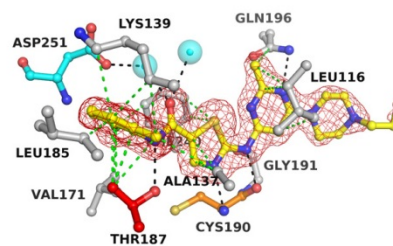

**Supplementary Figure S6: Detailed binding interactions of inhibitors with the ATP binding site of Myt1.** Stereo-presentations of the ATP binding site with ligand shown in yellow and the corresponding Fo-Fc electron density map (contoured at  $3\sigma$ ) in red. Protein residues are shown in gray, hinge residue Cys190 in orange, gatekeeper residue Thr187 in red, Asp251 of DFG in cyan and water molecules as cyan spheres. Hydrogen bonding interactions are indicated as black dotted lines and VDW interactions (hydrophobic) interactions as green dotted lines.

Supplementary Fig. S6 (continued)

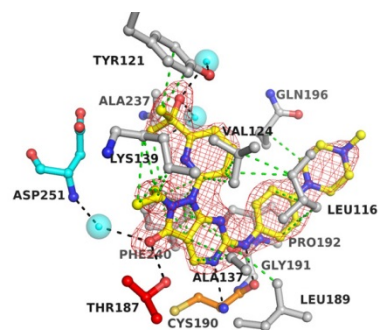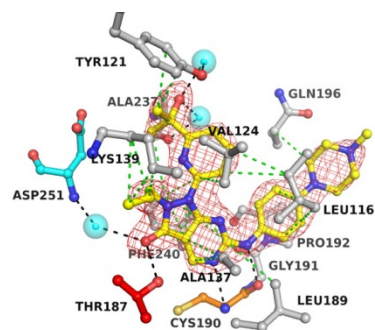

MK1775

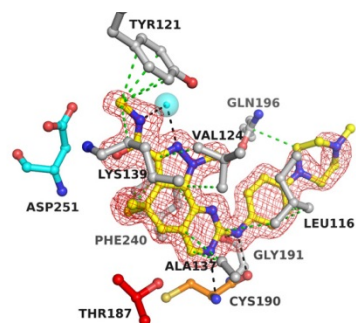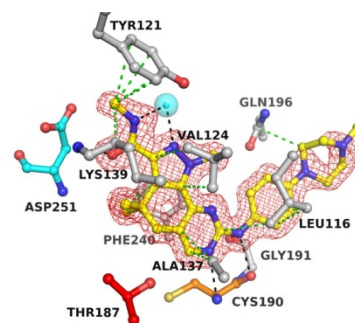

PHA-848125

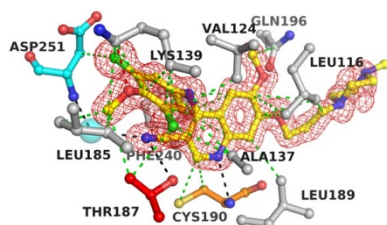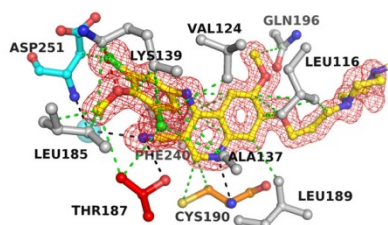

Bosutinib isomer

Supplementary Fig. S6 (continued)

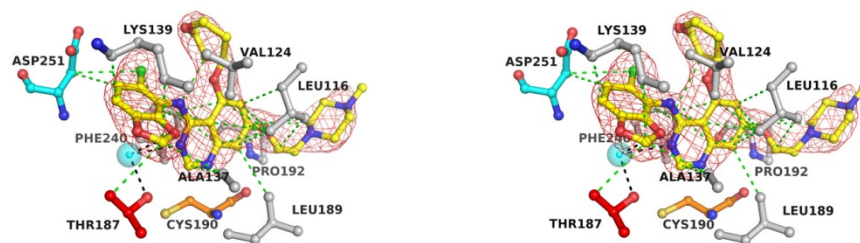

Saracatinib with untreated Myt1

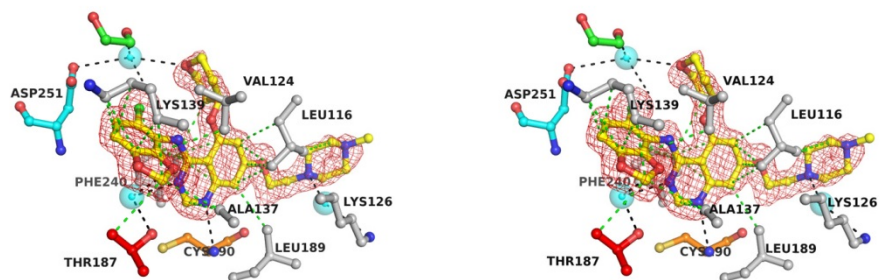

Saracatinib with LAMBD-treated Myt1

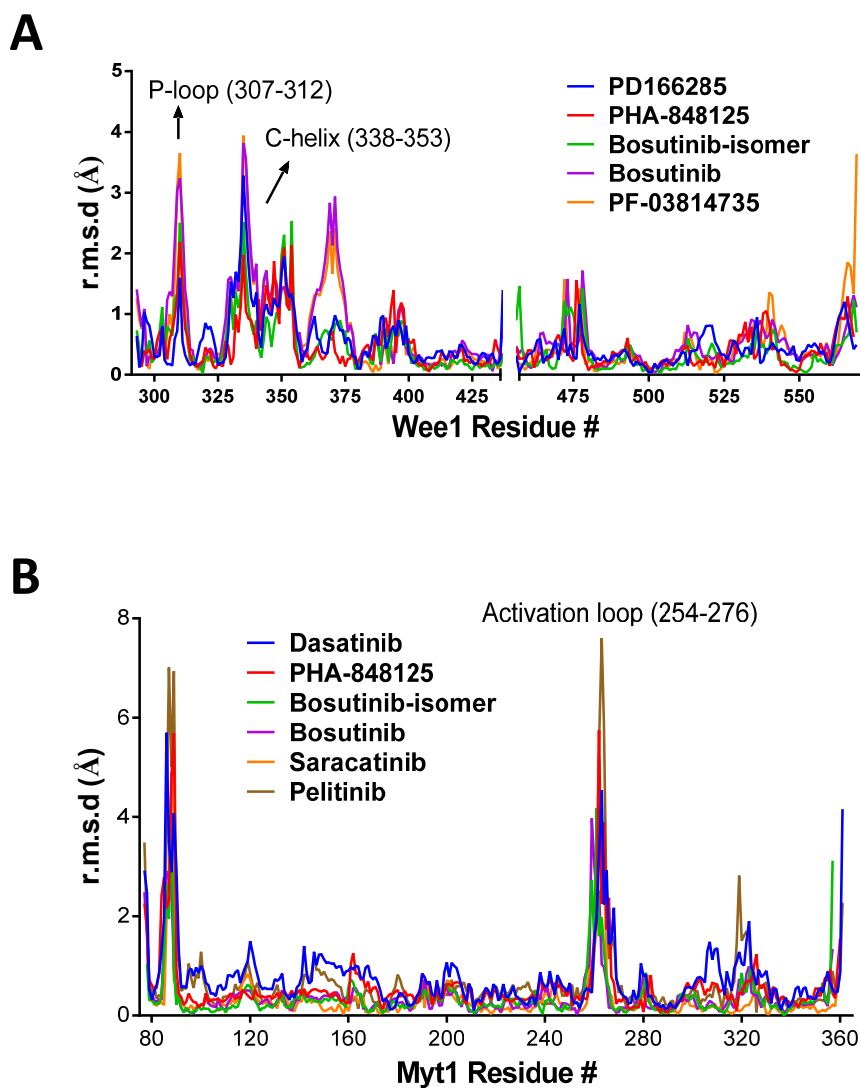

**Supplementary Figure S7: Root mean square deviation plots of Wee1 (A) and Myt1 (B) inhibitor complexes.** Shown are the rmsd values of  $C\alpha$  atoms upon superimposition using LSqKabsch of the CCP4 suite. The reference structures were those of the proteins liganded with MK1775.
