# Supplementary material
Source: PubMed Central journal article supplement (PMC6200136)
Supplement: NIHMS986748-supplement-S3.pdf [file NIHMS986748-supplement-S3.pdf]

Compound SMILES

MK-1775 O=C1N(CC=C)N(C2=NC(C(C)(C)O)=CC=C2)C3=NC(NC4=CC=C(N5CCN(C)CC5)C=C4)=NC=C31

BI-2536 CC[C@H]1N(C2CCCC2)C2=NC(NC3=CC=C(C=C3OC)C(=O)NC3CCN(C)CC3)=NC=C2N(C)C1=O

GSK-46136 C[C@@H](OC1=C(SC(=C1)N1C=NC2=C1C=C(CN1CCN(C)CC1)C=C2)C(N)=O)C1=CC=CC=C1C(F)(F)F

PF-038147: O=C(CNC(C)=O)N1[C@H](CC[C@@H]21)C3=C2C=C(NC(N=C4)=NC(NC5CCC5)=C4C(F)(F)F)C=C3

PD-166285 O=C1C(C2=C(Cl)C=CC=C2Cl)=CC3=C(N1C)N=C(NC4=CC=C(OCCN(CC)CC)C=C4)N=C3

PHA-84812 CC1(C)C2=C(N(C)N=C2C(NC)=O)C3=NC(NC4=CC=C(N5CCN(C)CC5)C=C4)=NC=C3C1

Bosutinib COC1=C(Cl)C=C(Cl)C(NC2=C(C#N)C=NC3=C2C=C(OC)C(OCCCN4CCN(CC4)C)=C3)=C1

Bosutinib i: ClC1=C(OC)C(Cl)=CC(NC2=C(C#N)C=NC3=C2C=C(OC)C(OCCCN4CCN(CC4)C)=C3)=C1

Dasatinib ClC1=CC=CC(C)=C1NC(C(S2)=CN=C2NC3=CC(N4CCN(CCO)CC4)=NC(C)=N3)=O

Pelitinib FC(C=C1)=C(Cl)C=C1NC2=C(C#N)C=NC3=CC(OCC)=C(NC(/C=C/CN(C)C)=O)C=C32

Saracatinib CN(CC1)CCN1CCOC2=CC(OC3CCOCC3)=C4C(N=CN=C4NC5=C(Cl)C=CC6=C5OCO6)=C2
