# Supplementary material
Source: PubMed Central journal article supplement (PMC6200136)
Supplement: NIHMS986748-supplement-Table_S4.pdf [file NIHMS986748-supplement-Table_S4.pdf]

| Protein           | Ligand name      | PDB ID | Ligand PDB ID | Space group                                    | Data Collection |        |        |       |        |        |                         |                    |                       |                  |            | Structure Refinement    |                        |                                              |                                                  |                                                 |                                                  |                            |                                   |                   |                      |                         |                         |
|-------------------|------------------|--------|---------------|------------------------------------------------|-----------------|--------|--------|-------|--------|--------|-------------------------|--------------------|-----------------------|------------------|------------|-------------------------|------------------------|----------------------------------------------|--------------------------------------------------|-------------------------------------------------|--------------------------------------------------|----------------------------|-----------------------------------|-------------------|----------------------|-------------------------|-------------------------|
|                   |                  |        |               |                                                | Cell dimensions |        |        |       |        |        | Resolution range        | Unique reflections | Rsym <sup>a</sup> (%) | Completeness (%) | I/σI       | Rcryst <sup>b</sup> (%) | Rfree <sup>c</sup> (%) | Average B all <sup>d</sup> (Å <sup>2</sup> ) | Average B protein <sup>e</sup> (Å <sup>2</sup> ) | Average B ligand <sup>f</sup> (Å <sup>2</sup> ) | Average B solvent <sup>g</sup> (Å <sup>2</sup> ) | Wilson B (Å <sup>2</sup> ) | rmsd <sup>h</sup> bond length (Å) | rmsd angles (deg) | Coordinate error (Å) | Ramachadran favored (%) | Ramachadran allowed (%) |
|                   |                  |        |               |                                                | a               | b      | c      | α     | β      | γ      |                         |                    |                       |                  |            |                         |                        |                                              |                                                  |                                                 |                                                  |                            |                                   |                   |                      |                         |                         |
| Wee1              | MK1775           | 5V5Y   | 8X7           | P 2 <sub>1</sub> 2 <sub>1</sub> 2 <sub>1</sub> | 50.08           | 63.10  | 82.46  | 90.00 | 90.00  | 90.00  | 1.90-100.00 (1.90-1.95) | 21,197 (1,544)     | 5.1 (36.1)            | 100.0 (100.0)    | 22.2 (4.8) | 17.1                    | 21.5                   | 33.5                                         | 33.5                                             | 22.5                                            | 37.0                                             | 22.8                       | 0.006                             | 0.98              | 0.19                 | 98.04                   | 1.96                    |
| Wee1              | PD166285         | 5VC5   | 96M           | P 2 <sub>1</sub>                               | 50.53           | 44.40  | 61.98  | 90.00 | 99.97  | 90.00  | 1.93-100.00 (1.93-1.98) | 20,256 (1,475)     | 2.8 (31.0)            | 98.4 (99.2)      | 25.1 (3.7) | 17.6                    | 21.7                   | 42.5                                         | 42.9                                             | 28.0                                            | 41.0                                             | 28.1                       | 0.012                             | 1.37              | 0.20                 | 97.30                   | 2.70                    |
| Wee1              | PHA-848125       | 5VC6   | P48           | P 2 <sub>1</sub>                               | 50.43           | 44.92  | 64.80  | 90.00 | 102.91 | 90.00  | 2.00-100.00 (2.00-2.05) | 18,665 (1,378)     | 4.5 (26.5)            | 96.3 (95.3)      | 20.2 (5.6) | 22.0                    | 26.5                   | 34.2                                         | 34.6                                             | 27.5                                            | 28.2                                             | 25.5                       | 0.007                             | 1.01              | 0.28                 | 96.10                   | 3.90                    |
| Wee1              | Bosutinib isomer | 5VC4   | X2N           | P 2 <sub>1</sub>                               | 50.67           | 44.25  | 64.80  | 90.00 | 101.73 | 90.00  | 2.10-100.00 (2.10-2.15) | 16,101 (1,172)     | 4.8 (34.3)            | 96.7 (98.6)      | 14.4 (3.2) | 19.3                    | 21.2                   | 48.8                                         | 49.2                                             | 37.1                                            | 43.9                                             | 33.1                       | 0.002                             | 0.64              | 0.23                 | 98.44                   | 1.56                    |
| Wee1              | Bosutinib        | 5VC3   | DB8           | P 2 <sub>1</sub>                               | 50.49           | 45.22  | 60.42  | 90.00 | 102.43 | 90.00  | 1.90-20.00 (1.90-1.95)  | 20,512 (1,502)     | 5.8 (35.3)            | 96.6 (94.8)      | 12.5 (3.8) | 21.2                    | 25.4                   | 45.2                                         | 45.5                                             | 41.0                                            | 40.0                                             | 29.1                       | 0.006                             | 0.95              | 0.18                 | 98.44                   | 1.56                    |
| Wee1              | PF-03814735      | 5VD2   | 34W           | P 2 <sub>1</sub>                               | 50.52           | 45.71  | 59.44  | 90.00 | 102.52 | 90.00  | 2.05-100.00 (2.05-2.10) | 16,847 (1,225)     | 3.5 (26.5)            | 98.8 (99.7)      | 20.2 (4.7) | 20.3                    | 25.5                   | 48.2                                         | 48.5                                             | 42.8                                            | 40.3                                             | 34.1                       | 0.003                             | 0.56              | 0.20                 | 97.64                   | 1.97                    |
| Wee2              | MK1775           | 5VDK   | 8X7           | P 3 <sub>2</sub>                               | 68.81           | 68.81  | 58.04  | 90.00 | 90.00  | 120.00 | 2.70-20.00 (2.70-2.77)  | 8,422 (640)        | 9.7 (57.0)            | 100.0 (100.0)    | 12.4 (3.4) | 22.5                    | 22.8                   | 58.2                                         | 59.0                                             | 27.8                                            | 32.3                                             | 46.1                       | 0.003                             | 0.70              | 0.48                 | 93.75                   | 4.30                    |
| Myt1              | Dasatinib        | 5VCV   | 1N1           | P 2 <sub>1</sub> 2 <sub>1</sub> 2 <sub>1</sub> | 56.13           | 68.63  | 75.44  | 90.00 | 90.00  | 90.00  | 1.92-20.00 (1.92-1.97)  | 22,471 (1,609)     | 5.3 (29.6)            | 98.2 (96.8)      | 28.0 (5.1) | 15.6                    | 19.7                   | 26.0                                         | 26.0                                             | 17.7                                            | 27.0                                             | 18.9                       | 0.012                             | 1.29              | 0.18                 | 97.90                   | 2.10                    |
| Myt1              | Pelitinib        | 5VCW   | 93J           | P 2 <sub>1</sub>                               | 50.51           | 112.90 | 72.71  | 90.00 | 109.27 | 90.00  | 2.25-100.00 (2.25-2.31) | 36,183 (9,176)     | 7.6 (30.2)            | 98.9 (99.4)      | 10.3 (3.9) | 19.6                    | 24.6                   | 69.7                                         | 69.8                                             | 56.7                                            | 75.5                                             | 43.2                       | 0.010                             | 1.24              | 0.29                 | 96.82                   | 3.18                    |
| Myt1              | Saracatinib      | 5VCX   | H8H           | P 2 <sub>1</sub> 2 <sub>1</sub> 2 <sub>1</sub> | 56.48           | 69.43  | 86.53  | 90.00 | 90.00  | 90.00  | 2.70-100.00 (2.70-2.77) | 9,718 (712)        | 4.7 (32.8)            | 99.2 (99.9)      | 27.8 (4.8) | 20.1                    | 24.4                   | 54.6                                         | 55.2                                             | 39.8                                            | 35.4                                             | 49.5                       | 0.007                             | 1.16              | 0.33                 | 95.79                   | 3.86                    |
| Myt1 <sup>l</sup> | MK1775           | 5VD0   | 8X7           | P 2 <sub>1</sub> 2 <sub>1</sub> 2 <sub>1</sub> | 46.78           | 53.87  | 113.62 | 90.00 | 90.00  | 90.00  | 2.13-100.00 (2.13-2.19) | 16,578 (1,193)     | 5.9 (35.8)            | 99.3 (99.4)      | 17.2 (4.1) | 19.5                    | 23.1                   | 40.0                                         | 40.5                                             | 29.6                                            | 30.2                                             | 27.5                       | 0.006                             | 0.84              | 0.19                 | 97.58                   | 2.42                    |
| Myt1 <sup>l</sup> | PHA-848125       | 5VD1   | P48           | P 2 <sub>1</sub> 2 <sub>1</sub> 2 <sub>1</sub> | 46.55           | 55.39  | 113.81 | 90.00 | 90.00  | 90.00  | 1.70-100.00 (1.70-1.74) | 32,777 (2,369)     | 6.7 (30.7)            | 98.7 (97.7)      | 14.0 (4.3) | 14.7                    | 19.4                   | 25.5                                         | 25.4                                             | 17.5                                            | 27.9                                             | 16.7                       | 0.012                             | 1.41              | 0.15                 | 97.95                   | 1.71                    |
| Myt1 <sup>l</sup> | Bosutinib isomer | 5VCZ   | X2N           | P 2 <sub>1</sub> 2 <sub>1</sub> 2 <sub>1</sub> | 46.63           | 54.97  | 113.53 | 90.00 | 90.00  | 90.00  | 2.00-100.00 (2.00-2.10) | 18,757 (2,514)     | 7.3 (27.6)            | 99.8 (100.0)     | 20.7 (7.3) | 14.8                    | 18.1                   | 22.6                                         | 22.3                                             | 15.0                                            | 26.9                                             | 13.5                       | 0.016                             | 1.61              | 0.13                 | 97.62                   | 2.38                    |
| Myt1 <sup>l</sup> | Bosutinib        | 5VCY   | DB8           | P 2 <sub>1</sub> 2 <sub>1</sub> 2 <sub>1</sub> | 46.63           | 55.00  | 113.66 | 90.00 | 90.00  | 90.00  | 1.56-100.00 (1.56-1.60) | 41,721 (3,073)     | 4.8 (35.8)            | 98.3 (98.9)      | 13.9 (2.9) | 14.0                    | 17.8                   | 23.1                                         | 22.3                                             | 19.4                                            | 31.1                                             | 15.2                       | 0.007                             | 1.18              | 0.12                 | 97.64                   | 2.36                    |
| Myt1 <sup>l</sup> | Saracatinib      | 5VD3   | H8H           | P 2 <sub>1</sub> 2 <sub>1</sub> 2 <sub>1</sub> | 47.04           | 54.06  | 114.11 | 90.00 | 90.00  | 90.00  | 1.80-100.00 (1.80-1.85) | 27,545 (1,996)     | 5.0 (32.1)            | 99.4 (99.8)      | 17.2 (4.4) | 16.6                    | 20.4                   | 29.6                                         | 29.8                                             | 21.9                                            | 28.5                                             | 18.1                       | 0.003                             | 0.87              | 0.16                 | 95.85                   | 3.80                    |

<sup>a</sup> Rsym = 100 x Σ|I<sub>h</sub> - I<sub>k</sub>| / ΣI<sub>h</sub> where h are unique reflection indices.

<sup>b</sup> Rcryst = 100 x Σ|F<sub>obs</sub> - F<sub>model</sub>| / ΣF<sub>obs</sub> where F<sub>obs</sub> and F<sub>model</sub> are observed and calculated structure factor amplitudes respectively.

<sup>c</sup> Rfree is Rcryst calculated for randomly chosen unique reflections.

<sup>d</sup> Excluding hydrogen atoms

<sup>e</sup> rmsd = root-mean-square deviation from ideal values, which were excluded from the refinement.

<sup>f</sup> Protein treated with Lambda phosphatase prior to crystallization.
