# Supplementary material
Source: PubMed Central journal article supplement (PMC6200136)
Supplement: NIHMS986748-supplement-Table_S5.pdf [file NIHMS986748-supplement-Table_S5.pdf]

**Supplementary Table S5: Kinome profiling results of MK-1775 (500 nM single concentration) determined by Discoverx Corp.**

| <b>Discoverx Gene Symbol</b>  | <b>Entrez Gene Symbol</b> | <b>Activity remaining (% of control)</b> |
|-------------------------------|---------------------------|------------------------------------------|
| AAK1                          | AAK1                      | 65                                       |
| ABL1(E255K)-phosphorylated    | ABL1                      | 5                                        |
| ABL1(F317I)-nonphosphorylated | ABL1                      | 79                                       |
| ABL1(F317I)-phosphorylated    | ABL1                      | 94                                       |
| ABL1(F317L)-nonphosphorylated | ABL1                      | 80                                       |
| ABL1(F317L)-phosphorylated    | ABL1                      | 51                                       |
| ABL1(H396P)-nonphosphorylated | ABL1                      | 0.85                                     |
| ABL1(H396P)-phosphorylated    | ABL1                      | 11                                       |
| ABL1(M351T)-phosphorylated    | ABL1                      | 9.9                                      |
| ABL1(Q252H)-nonphosphorylated | ABL1                      | 2.2                                      |
| ABL1(Q252H)-phosphorylated    | ABL1                      | 6.4                                      |
| ABL1(T315I)-nonphosphorylated | ABL1                      | 65                                       |
| ABL1(T315I)-phosphorylated    | ABL1                      | 52                                       |
| ABL1(Y253F)-phosphorylated    | ABL1                      | 11                                       |
| ABL1-nonphosphorylated        | ABL1                      | 15                                       |
| ABL1-phosphorylated           | ABL1                      | 10                                       |
| ABL2                          | ABL2                      | 76                                       |
| ACVR1                         | ACVR1                     | 100                                      |
| ACVR1B                        | ACVR1B                    | 100                                      |
| ACVR2A                        | ACVR2A                    | 83                                       |
| ACVR2B                        | ACVR2B                    | 96                                       |
| ACVRL1                        | ACVRL1                    | 78                                       |
| ADCK3                         | CABC1                     | 98                                       |
| ADCK4                         | ADCK4                     | 99                                       |
| AKT1                          | AKT1                      | 95                                       |
| AKT2                          | AKT2                      | 100                                      |
| AKT3                          | AKT3                      | 96                                       |
| ALK                           | ALK                       | 100                                      |
| ALK(C1156Y)                   | ALK                       | 100                                      |
| ALK(L1196M)                   | ALK                       | 73                                       |
| AMPK-alpha1                   | PRKAA1                    | 100                                      |
| AMPK-alpha2                   | PRKAA2                    | 99                                       |
| ANKK1                         | ANKK1                     | 91                                       |
| ARK5                          | NUAK1                     | 76                                       |
| ASK1                          | MAP3K5                    | 100                                      |
| ASK2                          | MAP3K6                    | 95                                       |
| AURKA                         | AURKA                     | 94                                       |
| AURKB                         | AURKB                     | 72                                       |
| AURKC                         | AURKC                     | 90                                       |
| AXL                           | AXL                       | 90                                       |
| BIKE                          | BMP2K                     | 78                                       |
| BLK                           | BLK                       | 52                                       |
| BMPR1A                        | BMPR1A                    | 94                                       |
| BMPR1B                        | BMPR1B                    | 95                                       |
| BMPR2                         | BMPR2                     | 80                                       |
| BMX                           | BMX                       | 100                                      |
| BRAF                          | BRAF                      | 81                                       |
| BRAF(V600E)                   | BRAF                      | 90                                       |
| BRK                           | PTK6                      | 96                                       |
| BRSK1                         | BRSK1                     | 78                                       |
| BRSK2                         | BRSK2                     | 100                                      |
| BTK                           | BTK                       | 100                                      |

|                     |          |     |
|---------------------|----------|-----|
| BUB1                | BUB1     | 100 |
| CAMK1               | CAMK1    | 98  |
| CAMK1B              | PNCK     | 59  |
| CAMK1D              | CAMK1D   | 82  |
| CAMK1G              | CAMK1G   | 93  |
| CAMK2A              | CAMK2A   | 83  |
| CAMK2B              | CAMK2B   | 94  |
| CAMK2D              | CAMK2D   | 86  |
| CAMK2G              | CAMK2G   | 82  |
| CAMK4               | CAMK4    | 82  |
| CAMKK1              | CAMKK1   | 70  |
| CAMKK2              | CAMKK2   | 63  |
| CASK                | CASK     | 56  |
| CDC2L1              | CDK11B   | 90  |
| CDC2L2              | CDC2L2   | 99  |
| CDC2L5              | CDK13    | 100 |
| CDK11               | CDK19    | 99  |
| CDK2                | CDK2     | 94  |
| CDK3                | CDK3     | 97  |
| CDK4                | CDK4     | 100 |
| CDK4-cyclinD1       | CDK4     | 12  |
| CDK4-cyclinD3       | CDK4     | 20  |
| CDK5                | CDK5     | 91  |
| CDK7                | CDK7     | 63  |
| CDK8                | CDK8     | 94  |
| CDK9                | CDK9     | 88  |
| CDKL1               | CDKL1    | 86  |
| CDKL2               | CDKL2    | 93  |
| CDKL3               | CDKL3    | 100 |
| CDKL5               | CDKL5    | 100 |
| CHEK1               | CHEK1    | 64  |
| CHEK2               | CHEK2    | 86  |
| CIT                 | CIT      | 77  |
| CLK1                | CLK1     | 60  |
| CLK2                | CLK2     | 93  |
| CLK3                | CLK3     | 97  |
| CLK4                | CLK4     | 87  |
| CSF1R               | CSF1R    | 96  |
| CSF1R-autoinhibited | CSF1R    | 100 |
| CSK                 | CSK      | 97  |
| CSNK1A1             | CSNK1A1  | 89  |
| CSNK1A1L            | CSNK1A1L | 94  |
| CSNK1D              | CSNK1D   | 73  |
| CSNK1E              | CSNK1E   | 100 |
| CSNK1G1             | CSNK1G1  | 79  |
| CSNK1G2             | CSNK1G2  | 92  |
| CSNK1G3             | CSNK1G3  | 89  |
| CSNK2A1             | CSNK2A1  | 41  |
| CSNK2A2             | CSNK2A2  | 18  |
| CTK                 | MATK     | 90  |
| DAPK1               | DAPK1    | 78  |
| DAPK2               | DAPK2    | 99  |
| DAPK3               | DAPK3    | 99  |
| DCAMKL1             | DCLK1    | 79  |
| DCAMKL2             | DCLK2    | 100 |

|                           |          |     |
|---------------------------|----------|-----|
| DCAMKL3                   | DCLK3    | 67  |
| DDR1                      | DDR1     | 82  |
| DDR2                      | DDR2     | 85  |
| DLK                       | MAP3K12  | 100 |
| DMPK                      | DMPK     | 95  |
| DMPK2                     | CDC42BPG | 100 |
| DRAK1                     | STK17A   | 96  |
| DRAK2                     | STK17B   | 93  |
| DYRK1A                    | DYRK1A   | 90  |
| DYRK1B                    | DYRK1B   | 100 |
| DYRK2                     | DYRK2    | 100 |
| EGFR                      | EGFR     | 84  |
| EGFR(E746-A750del)        | EGFR     | 69  |
| EGFR(G719C)               | EGFR     | 95  |
| EGFR(G719S)               | EGFR     | 100 |
| EGFR(L747-E749del, A750P) | EGFR     | 60  |
| EGFR(L747-S752del, P753S) | EGFR     | 82  |
| EGFR(L747-T751del,Sins)   | EGFR     | 95  |
| EGFR(L858R)               | EGFR     | 73  |
| EGFR(L858R,T790M)         | EGFR     | 90  |
| EGFR(L861Q)               | EGFR     | 95  |
| EGFR(S752-I759del)        | EGFR     | 100 |
| EGFR(T790M)               | EGFR     | 72  |
| EIF2AK1                   | EIF2AK1  | 84  |
| EPHA1                     | EPHA1    | 93  |
| EPHA2                     | EPHA2    | 81  |
| EPHA3                     | EPHA3    | 60  |
| EPHA4                     | EPHA4    | 100 |
| EPHA5                     | EPHA5    | 100 |
| EPHA6                     | EPHA6    | 100 |
| EPHA7                     | EPHA7    | 100 |
| EPHA8                     | EPHA8    | 100 |
| EPHB1                     | EPHB1    | 100 |
| EPHB2                     | EPHB2    | 97  |
| EPHB3                     | EPHB3    | 100 |
| EPHB4                     | EPHB4    | 89  |
| EPHB6                     | EPHB6    | 2.4 |
| ERBB2                     | ERBB2    | 73  |
| ERBB3                     | ERBB3    | 50  |
| ERBB4                     | ERBB4    | 87  |
| ERK1                      | MAPK3    | 100 |
| ERK2                      | MAPK1    | 82  |
| ERK3                      | MAPK6    | 46  |
| ERK4                      | MAPK4    | 64  |
| ERK5                      | MAPK7    | 99  |
| ERK8                      | MAPK15   | 93  |
| ERN1                      | ERN1     | 100 |
| FAK                       | PTK2     | 84  |
| FER                       | FER      | 100 |
| FES                       | FES      | 97  |
| FGFR1                     | FGFR1    | 98  |
| FGFR2                     | FGFR2    | 91  |
| FGFR3                     | FGFR3    | 100 |
| FGFR3(G697C)              | FGFR3    | 95  |
| FGFR4                     | FGFR4    | 100 |

|                              |         |      |
|------------------------------|---------|------|
| FGR                          | FGR     | 46   |
| FLT1                         | FLT1    | 89   |
| FLT3                         | FLT3    | 43   |
| FLT3(D835H)                  | FLT3    | 28   |
| FLT3(D835V)                  | FLT3    | 5.5  |
| FLT3(D835Y)                  | FLT3    | 32   |
| FLT3(ITD)                    | FLT3    | 76   |
| FLT3(ITD,D835V)              | FLT3    | 50   |
| FLT3(ITD,F691L)              | FLT3    | 75   |
| FLT3(K663Q)                  | FLT3    | 48   |
| FLT3(N841I)                  | FLT3    | 47   |
| FLT3(R834Q)                  | FLT3    | 93   |
| FLT3-autoinhibited           | FLT3    | 100  |
| FLT4                         | FLT4    | 96   |
| FRK                          | FRK     | 56   |
| FYN                          | FYN     | 83   |
| GAK                          | GAK     | 2    |
| GCN2(Kin.Dom.2,S808G)        | EIF2AK4 | 0.9  |
| GRK1                         | GRK1    | 64   |
| GRK2                         | ADRBK1  | 100  |
| GRK3                         | ADRBK2  | 98   |
| GRK4                         | GRK4    | 86   |
| GRK7                         | GRK7    | 90   |
| GSK3A                        | GSK3A   | 100  |
| GSK3B                        | GSK3B   | 77   |
| HASPIN                       | GSG2    | 100  |
| HCK                          | HCK     | 47   |
| HIPK1                        | HIPK1   | 30   |
| HIPK2                        | HIPK2   | 17   |
| HIPK3                        | HIPK3   | 34   |
| HIPK4                        | HIPK4   | 37   |
| HPK1                         | MAP4K1  | 97   |
| HUNK                         | HUNK    | 76   |
| ICK                          | ICK     | 57   |
| IGF1R                        | IGF1R   | 100  |
| IKK-alpha                    | CHUK    | 99   |
| IKK-beta                     | IKBKB   | 76   |
| IKK-epsilon                  | IKBKE   | 50   |
| INSR                         | INSR    | 100  |
| INSRR                        | INSRR   | 90   |
| IRAK1                        | IRAK1   | 87   |
| IRAK3                        | IRAK3   | 69   |
| IRAK4                        | IRAK4   | 100  |
| ITK                          | ITK     | 100  |
| JAK1(JH1domain-catalytic)    | JAK1    | 87   |
| JAK1(JH2domain-pseudokinase) | JAK1    | 100  |
| JAK2(JH1domain-catalytic)    | JAK2    | 6.1  |
| JAK3(JH1domain-catalytic)    | JAK3    | 0.45 |
| JNK1                         | MAPK8   | 57   |
| JNK2                         | MAPK9   | 72   |
| JNK3                         | MAPK10  | 76   |
| KIT                          | KIT     | 98   |
| KIT(A829P)                   | KIT     | 100  |
| KIT(D816H)                   | KIT     | 98   |
| KIT(D816V)                   | KIT     | 88   |

|                   |          |     |
|-------------------|----------|-----|
| KIT(L576P)        | KIT      | 100 |
| KIT(V559D)        | KIT      | 100 |
| KIT(V559D,T670I)  | KIT      | 100 |
| KIT(V559D,V654A)  | KIT      | 94  |
| KIT-autoinhibited | KIT      | 100 |
| LATS1             | LATS1    | 100 |
| LATS2             | LATS2    | 92  |
| LCK               | LCK      | 11  |
| LIMK1             | LIMK1    | 100 |
| LIMK2             | LIMK2    | 100 |
| LKB1              | STK11    | 84  |
| LOK               | STK10    | 95  |
| LRRK2             | LRRK2    | 58  |
| LRRK2(G2019S)     | LRRK2    | 86  |
| LTK               | LTK      | 100 |
| LYN               | LYN      | 73  |
| LZK               | MAP3K13  | 88  |
| MAK               | MAK      | 69  |
| MAP3K1            | MAP3K1   | 69  |
| MAP3K15           | MAP3K15  | 79  |
| MAP3K2            | MAP3K2   | 31  |
| MAP3K3            | MAP3K3   | 16  |
| MAP3K4            | MAP3K4   | 5.5 |
| MAP4K2            | MAP4K2   | 100 |
| MAP4K3            | MAP4K3   | 72  |
| MAP4K4            | MAP4K4   | 84  |
| MAP4K5            | MAP4K5   | 67  |
| MAPKAPK2          | MAPKAPK2 | 87  |
| MAPKAPK5          | MAPKAPK5 | 100 |
| MARK1             | MARK1    | 100 |
| MARK2             | MARK2    | 47  |
| MARK3             | MARK3    | 86  |
| MARK4             | MARK4    | 100 |
| MAST1             | MAST1    | 60  |
| MEK1              | MAP2K1   | 98  |
| MEK2              | MAP2K2   | 88  |
| MEK3              | MAP2K3   | 88  |
| MEK4              | MAP2K4   | 80  |
| MEK5              | MAP2K5   | 41  |
| MEK6              | MAP2K6   | 96  |
| MELK              | MELK     | 100 |
| MERTK             | MERTK    | 100 |
| MET               | MET      | 100 |
| MET(M1250T)       | MET      | 94  |
| MET(Y1235D)       | MET      | 79  |
| MINK              | MINK1    | 78  |
| MKK7              | MAP2K7   | 100 |
| MKMK1             | MKMK1    | 98  |
| MKMK2             | MKMK2    | 86  |
| MLCK              | MYLK3    | 96  |
| MLK1              | MAP3K9   | 84  |
| MLK2              | MAP3K10  | 88  |
| MLK3              | MAP3K11  | 89  |
| MRCKA             | CDC42BPA | 100 |
| MRCKB             | CDC42BPB | 99  |

|                       |             |     |
|-----------------------|-------------|-----|
| MST1                  | STK4        | 100 |
| MST1R                 | MST1R       | 80  |
| MST2                  | STK3        | 86  |
| MST3                  | STK24       | 91  |
| MST4                  | MST4        | 81  |
| MTOR                  | MTOR        | 73  |
| MUSK                  | MUSK        | 66  |
| MYLK                  | MYLK        | 93  |
| MYLK2                 | MYLK2       | 100 |
| MYLK4                 | MYLK4       | 100 |
| MYO3A                 | MYO3A       | 98  |
| MYO3B                 | MYO3B       | 99  |
| NDR1                  | STK38       | 91  |
| NDR2                  | STK38L      | 90  |
| NEK1                  | NEK1        | 98  |
| NEK10                 | NEK10       | 87  |
| NEK11                 | NEK11       | 27  |
| NEK2                  | NEK2        | 49  |
| NEK3                  | NEK3        | 8.7 |
| NEK4                  | NEK4        | 94  |
| NEK5                  | NEK5        | 100 |
| NEK6                  | NEK6        | 96  |
| NEK7                  | NEK7        | 81  |
| NEK9                  | NEK9        | 95  |
| NIK                   | MAP3K14     | 100 |
| NIM1                  | MGC42105    | 74  |
| NLK                   | NLK         | 85  |
| OSR1                  | OXR1        | 87  |
| p38-alpha             | MAPK14      | 88  |
| p38-beta              | MAPK11      | 94  |
| p38-delta             | MAPK13      | 100 |
| p38-gamma             | MAPK12      | 83  |
| PAK1                  | PAK1        | 91  |
| PAK2                  | PAK2        | 100 |
| PAK3                  | PAK3        | 81  |
| PAK4                  | PAK4        | 89  |
| PAK6                  | PAK6        | 100 |
| PAK7                  | PAK7        | 68  |
| PCK1                  | CDK16       | 81  |
| PCK2                  | CDK17       | 68  |
| PCK3                  | CDK18       | 94  |
| PDGFRA                | PDGFRA      | 99  |
| PDGFRB                | PDGFRB      | 94  |
| PDPK1                 | PDPK1       | 95  |
| PFCDPK1(P.falciparum) | CDPK1       | 100 |
| PFPK5(P.falciparum)   | MAL13P1.279 | 100 |
| PFTAIRE2              | CDK15       | 87  |
| PFTK1                 | CDK14       | 90  |
| PHKG1                 | PHKG1       | 97  |
| PHKG2                 | PHKG2       | 85  |
| PIK3C2B               | PIK3C2B     | 100 |
| PIK3C2G               | PIK3C2G     | 88  |
| PIK3CA                | PIK3CA      | 100 |
| PIK3CA(C420R)         | PIK3CA      | 100 |
| PIK3CA(E542K)         | PIK3CA      | 85  |

|                      |          |      |
|----------------------|----------|------|
| PIK3CA(E545A)        | PIK3CA   | 92   |
| PIK3CA(E545K)        | PIK3CA   | 60   |
| PIK3CA(H1047L)       | PIK3CA   | 100  |
| PIK3CA(H1047Y)       | PIK3CA   | 95   |
| PIK3CA(I800L)        | PIK3CA   | 83   |
| PIK3CA(M1043I)       | PIK3CA   | 92   |
| PIK3CA(Q546K)        | PIK3CA   | 89   |
| PIK3CB               | PIK3CB   | 90   |
| PIK3CD               | PIK3CD   | 100  |
| PIK3CG               | PIK3CG   | 100  |
| PIK4CB               | PI4KB    | 45   |
| PIKFYVE              | PIKFYVE  | 77   |
| PIM1                 | PIM1     | 95   |
| PIM2                 | PIM2     | 95   |
| PIM3                 | PIM3     | 100  |
| PIP5K1A              | PIP5K1A  | 89   |
| PIP5K1C              | PIP5K1C  | 81   |
| PIP5K2B              | PIP4K2B  | 90   |
| PIP5K2C              | PIP4K2C  | 83   |
| PKAC-alpha           | PRKACA   | 93   |
| PKAC-beta            | PRKACB   | 100  |
| PKMYT1               | PKMYT1   | 45   |
| PKN1                 | PKN1     | 72   |
| PKN2                 | PKN2     | 81   |
| PKNB(M.tuberculosis) | pknB     | 31   |
| PLK1                 | PLK1     | 0.35 |
| PLK2                 | PLK2     | 0.6  |
| PLK3                 | PLK3     | 1.3  |
| PLK4                 | PLK4     | 84   |
| PRKCD                | PRKCD    | 100  |
| PRKCE                | PRKCE    | 78   |
| PRKCH                | PRKCH    | 100  |
| PRKCI                | PRKCI    | 82   |
| PRKCQ                | PRKCQ    | 53   |
| PRKD1                | PRKD1    | 69   |
| PRKD2                | PRKD2    | 92   |
| PRKD3                | PRKD3    | 54   |
| PRKG1                | PRKG1    | 100  |
| PRKG2                | PRKG2    | 95   |
| PRKR                 | EIF2AK2  | 79   |
| PRKX                 | PRKX     | 83   |
| PRP4                 | PRPF4B   | 89   |
| PYK2                 | PTK2B    | 95   |
| QSK                  | KIAA0999 | 80   |
| RAF1                 | RAF1     | 96   |
| RET                  | RET      | 94   |
| RET(M918T)           | RET      | 100  |
| RET(V804L)           | RET      | 100  |
| RET(V804M)           | RET      | 75   |
| RIOK1                | RIOK1    | 71   |
| RIOK2                | RIOK2    | 85   |
| RIOK3                | RIOK3    | 100  |
| RIPK1                | RIPK1    | 100  |
| RIPK2                | RIPK2    | 100  |
| RIPK4                | RIPK4    | 57   |

|                               |         |     |
|-------------------------------|---------|-----|
| RIPK5                         | DSTYK   | 98  |
| ROCK1                         | ROCK1   | 100 |
| ROCK2                         | ROCK2   | 100 |
| ROS1                          | ROS1    | 100 |
| RPS6KA4(Kin.Dom.1-N-terminal) | RPS6KA4 | 97  |
| RPS6KA4(Kin.Dom.2-C-terminal) | RPS6KA4 | 94  |
| RPS6KA5(Kin.Dom.1-N-terminal) | RPS6KA5 | 100 |
| RPS6KA5(Kin.Dom.2-C-terminal) | RPS6KA5 | 83  |
| RSK1(Kin.Dom.1-N-terminal)    | RPS6KA1 | 100 |
| RSK1(Kin.Dom.2-C-terminal)    | RPS6KA1 | 74  |
| RSK2(Kin.Dom.1-N-terminal)    | RPS6KA3 | 69  |
| RSK2(Kin.Dom.2-C-terminal)    | RPS6KA3 | 100 |
| RSK3(Kin.Dom.1-N-terminal)    | RPS6KA2 | 91  |
| RSK3(Kin.Dom.2-C-terminal)    | RPS6KA2 | 100 |
| RSK4(Kin.Dom.1-N-terminal)    | RPS6KA6 | 75  |
| RSK4(Kin.Dom.2-C-terminal)    | RPS6KA6 | 70  |
| S6K1                          | RPS6KB1 | 83  |
| SBK1                          | SBK1    | 85  |
| SGK                           | SGK1    | 88  |
| SgK110                        | SgK110  | 89  |
| SGK2                          | SGK2    | 77  |
| SGK3                          | SGK3    | 69  |
| SIK                           | SIK1    | 87  |
| SIK2                          | SIK2    | 58  |
| SLK                           | SLK     | 24  |
| SNARK                         | NUAK2   | 69  |
| SNRK                          | SNRK    | 89  |
| SRC                           | SRC     | 19  |
| SRMS                          | SRMS    | 75  |
| SRPK1                         | SRPK1   | 92  |
| SRPK2                         | SRPK2   | 100 |
| SRPK3                         | SRPK3   | 89  |
| STK16                         | STK16   | 100 |
| STK33                         | STK33   | 21  |
| STK35                         | STK35   | 100 |
| STK36                         | STK36   | 91  |
| STK39                         | STK39   | 69  |
| SYK                           | SYK     | 70  |
| TAK1                          | MAP3K7  | 76  |
| TAOK1                         | TAOK1   | 100 |
| TAOK2                         | TAOK2   | 89  |
| TAOK3                         | TAOK3   | 100 |
| TBK1                          | TBK1    | 39  |
| TEC                           | TEC     | 97  |
| TESK1                         | TESK1   | 100 |
| TGFBR1                        | TGFBR1  | 94  |
| TGFBR2                        | TGFBR2  | 70  |
| TIE1                          | TIE1    | 60  |
| TIE2                          | TEK     | 98  |
| TLK1                          | TLK1    | 85  |
| TLK2                          | TLK2    | 100 |
| TNIK                          | TNIK    | 73  |
| TNK1                          | TNK1    | 38  |
| TNK2                          | TNK2    | 67  |
| TNNI3K                        | TNNI3K  | 37  |



|                              |         |      |
|------------------------------|---------|------|
| TRKA                         | NTRK1   | 28   |
| TRKB                         | NTRK2   | 80   |
| TRKC                         | NTRK3   | 74   |
| TRPM6                        | TRPM6   | 89   |
| TSSK1B                       | TSSK1B  | 100  |
| TSSK3                        | TSSK3   | 100  |
| TTK                          | TTK     | 100  |
| TXK                          | TXK     | 95   |
| TYK2(JH1domain-catalytic)    | TYK2    | 60   |
| TYK2(JH2domain-pseudokinase) | TYK2    | 15   |
| TYRO3                        | TYRO3   | 100  |
| ULK1                         | ULK1    | 69   |
| ULK2                         | ULK2    | 40   |
| ULK3                         | ULK3    | 78   |
| VEGFR2                       | KDR     | 94   |
| VPS34                        | PIK3C3  | 100  |
| VRK2                         | VRK2    | 100  |
| WEE1                         | WEE1    | 0.3  |
| WEE2                         | WEE2    | 0.25 |
| WNK1                         | WNK1    | 100  |
| WNK2                         | WNK2    | 99   |
| WNK3                         | WNK3    | 100  |
| WNK4                         | WNK4    | 100  |
| YANK1                        | STK32A  | 100  |
| YANK2                        | STK32B  | 100  |
| YANK3                        | STK32C  | 100  |
| YES                          | YES1    | 48   |
| YSK1                         | STK25   | 100  |
| YSK4                         | MAP3K19 | 0    |
| ZAK                          | ZAK     | 100  |
| ZAP70                        | ZAP70   | 100  |
